# Supplementary material for: Adaption of human antibody λ and κ light chain architectures to CDR repertoires
Source: PubMed Central journal article supplement — Protein Eng Des Sel. 2019 Sep 19;32(3):109–27. doi: 10.1093/protein/gzz012 (PMC6908821; doi:10.1093/protein/gzz012), 2019-09-19
Supplement: gzz012_supplementary_material.pdf [file gzz012_supplementary_material.pdf]

## Supplementary Material

### Supplementary Figures

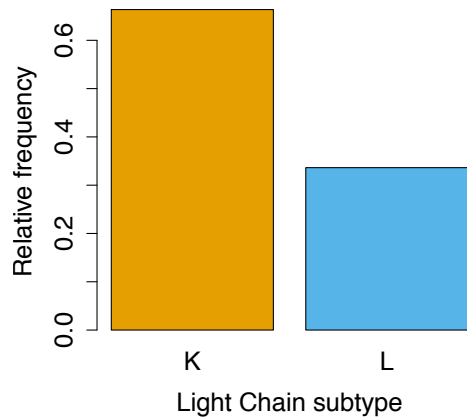

**Supplementary Figure 1 – Relative frequency of  $\kappa$  (orange) and  $\lambda$  (blue) in the dataset analyzed.**

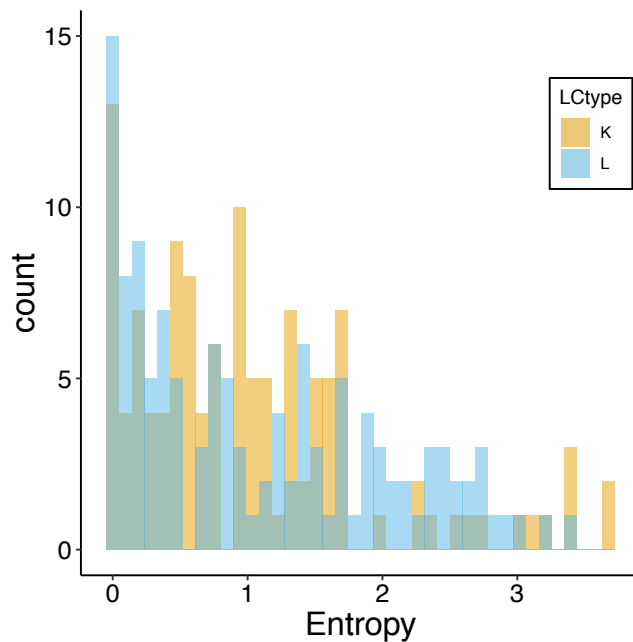

**Supplementary Figure 2 – The histogram displays the distribution of Shannon Entropy over the  $V_{L\lambda}$  and  $V_{L\kappa}$  multiple sequence alignments, calculated per sequence position. The Shannon entropy gives a measure of how the sequence diversity of each position. The Shannon Entropy was calculated per sequence position in the multiple sequence alignments of both,  $V_{L\kappa}$  (orange) and  $V_{L\lambda}$  (blue). The histogram was made by splitting the entropy over 40 bins.**

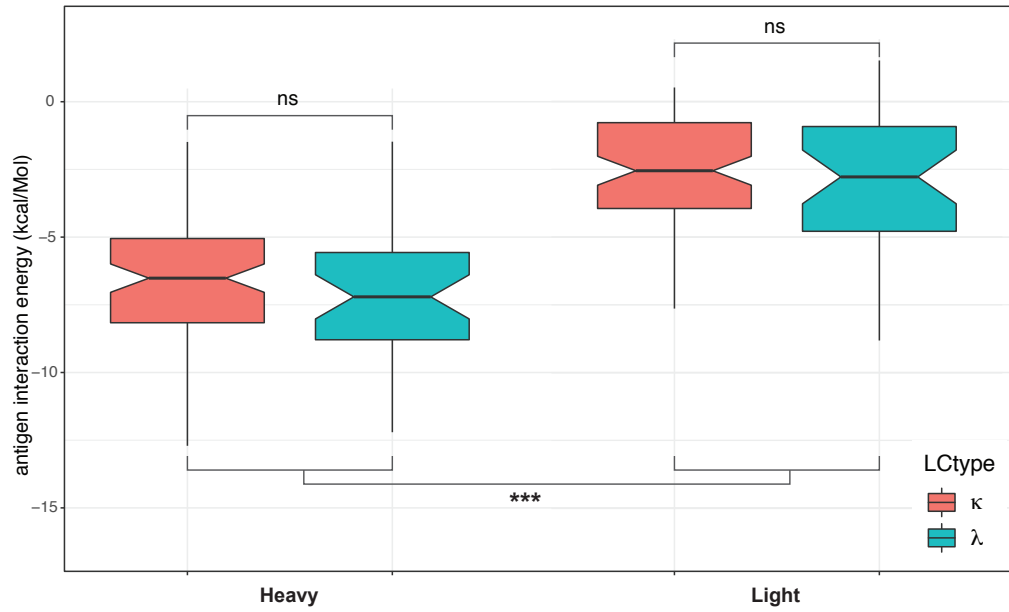

**Supplementary Figure 3 – The individual interaction energy with the antigen was calculated separately for both isotypes ( $\lambda$  and  $\kappa$ ) of the HC and LC. The particular energy contributions were computed by FoldX.**

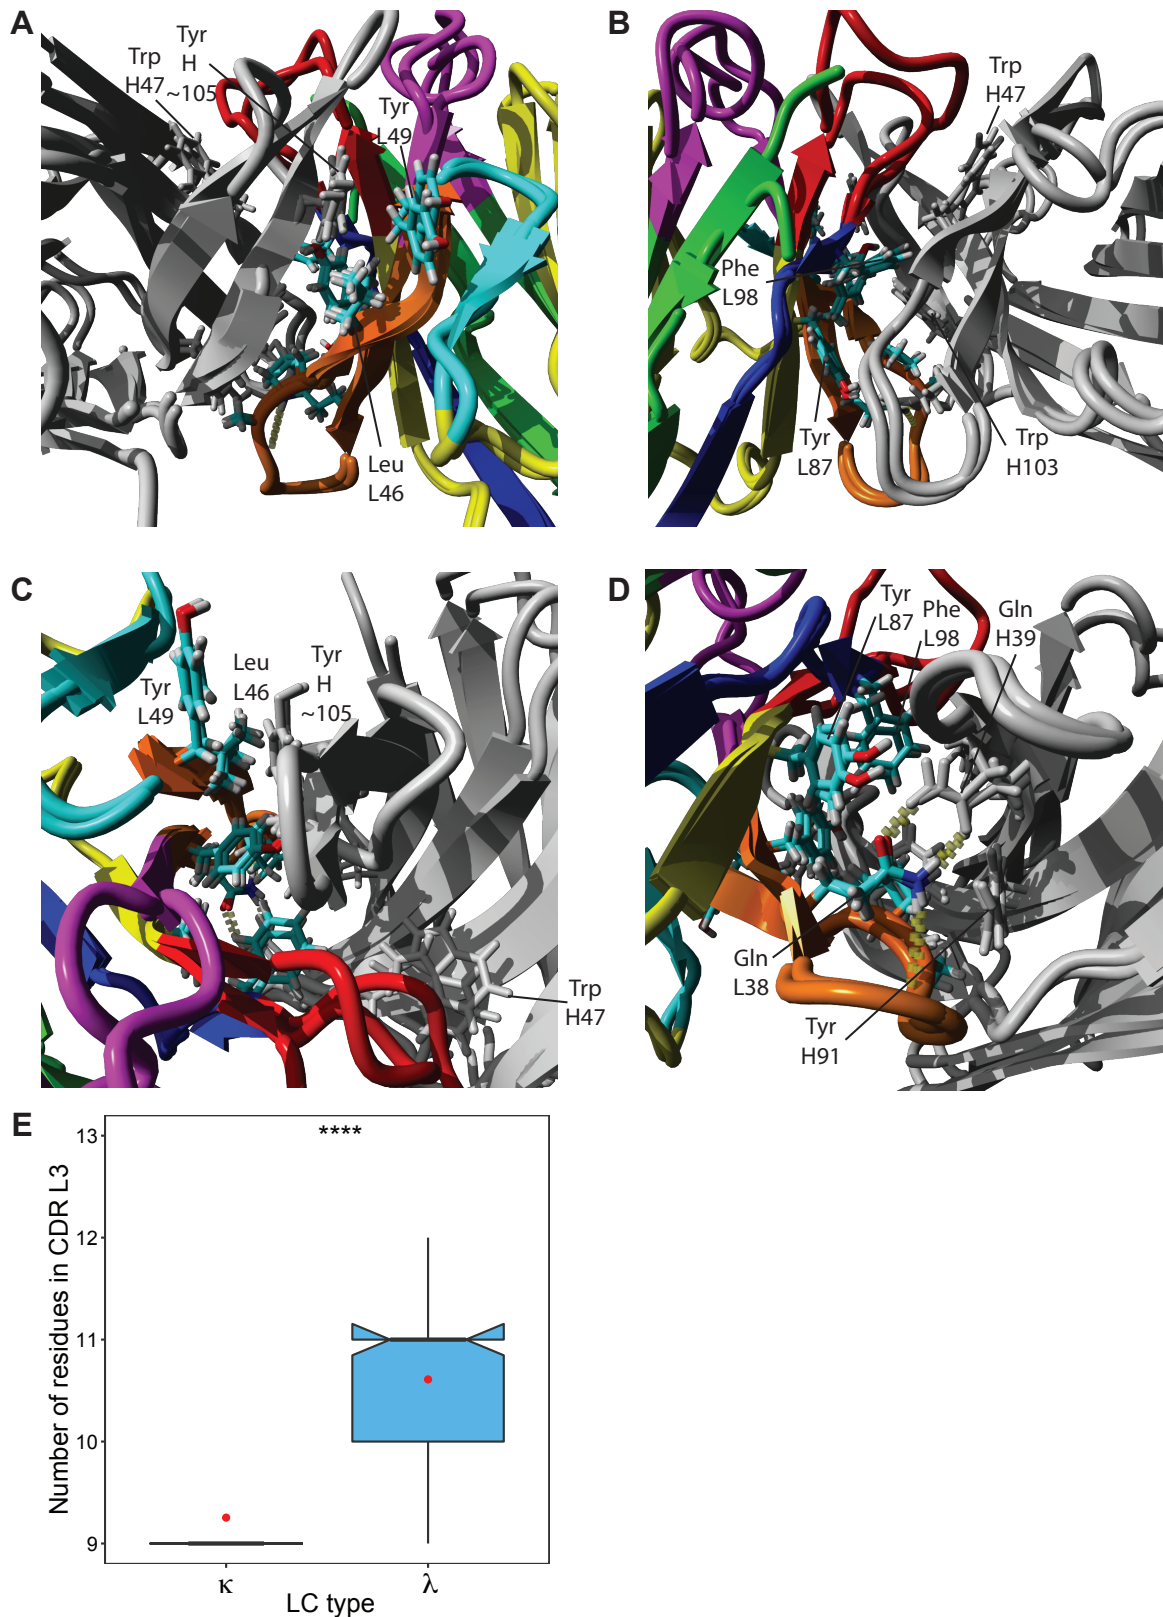

**Supplementary Figure 4 – Conserved network of interacting amino acids within the  $V_L$ - $V_H$  interface. (A-D)** Representative PDB structures of  $V_L\lambda$  (3ujj [1]) and  $V_L\kappa$  (5ifa [2]) illustrate their shared structural environment that forms the  $V_L$ - $V_H$  interface. The CDRs (L1, magenta; L2,

cyan; L3, red) and LFRs (LFR1, green; LFR2, orange; LFR3, yellow; LFR4, blue) of the  $V_L$  are color-coded and the  $V_H$  domain is shown in gray. Front **(A)** and back **(B)** view on CDRs that are oriented to the top. Top **(C)** and bottom **(D)** view at the  $V_L$ - $V_H$  interface. **(E)** The length of CDR L3 differs significantly between the isotypes, since the loop of  $\kappa$  (orange) consistently comprises nine residues and that of  $\lambda$  (blue) exhibits a varying length of eleven residues on average.

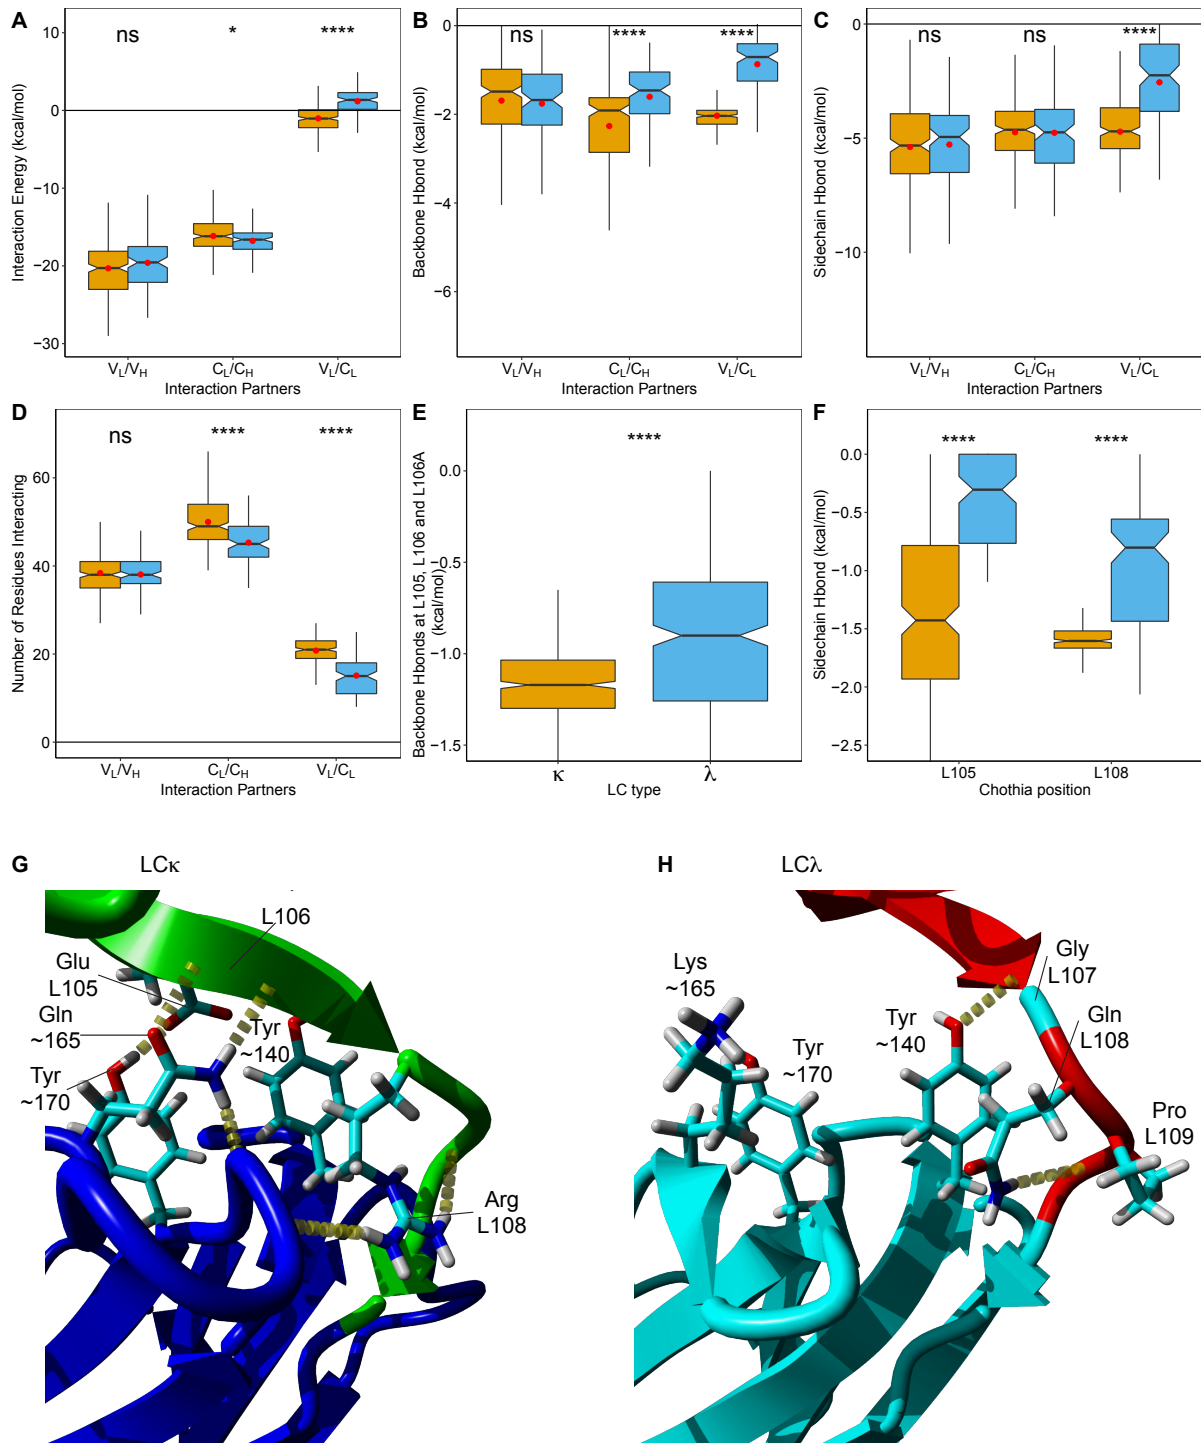

**Supplementary Figure 5 – Statistical analysis of the thermodynamic energies of inter-domain interactions within Fabs comprising  $\kappa$  or  $\lambda$ .** (A-F) Boxplots incorporate the dataset's entire value distribution (whiskers), 25<sup>th</sup> (lower limit of the box) and 75<sup>th</sup> percentile (upper limit), mean (red dot) as well as median (central line) with a 95% confidence interval (notches). Statistical significances were obtained by a Wilcoxon rank sum test and are indicated by ns ( $P > 0.05$ ), \* ( $P \leq 0.05$ ), \*\* ( $P \leq 0.01$ ), \*\*\* ( $P \leq 0.001$ ) and \*\*\*\* ( $P \leq 0.0001$ ). Comparisons are for both V<sub>L</sub>κ (orange) and V<sub>L</sub>λ (blue). (A) Total interaction energy between Fab domains. The interaction between V<sub>L</sub> and C<sub>L</sub> is significantly more thermodynamically stable in κ than in λ. (B) The contribution of backbone H-bonding to the inter-domain interaction energy. The interaction of V<sub>L</sub>-C<sub>L</sub> and C<sub>L</sub>-C<sub>H</sub> is significantly more stabilized by

backbone H-bonds in  $\kappa$  if compared to  $\lambda$ . **(C)** The contribution of sidechain H-bonding to the interaction energy of distinct Fab domains. The sidechain H-bonding within the  $V_L$ - $C_L$  interface is significantly more pronounced in  $\kappa$ . **(D)** Average number of residues that interact within the domain-domain interface. In  $\kappa$ , significantly more residues are involved in the  $V_L$ - $C_L$  and  $C_L$ - $C_H$  interaction. **(E)** The residual contribution of backbone H-bonding within the hinge region between  $V_L$ - $C_L$  (L105, L106 and L106A). These residues consistently form more backbone H-bonds in  $\kappa$  if compared to  $\lambda$ . **(F)** The residual contribution of sidechain H-bonding within the hinge region. Both, L105 and L108, consistently form more sidechain H-bonds in  $\kappa$  than in  $\lambda$ . **(G, H)** Representative structures of  $LC\kappa$  (**G**, PDBid: 5ifa [2]) and  $LC\lambda$  (**H**, PDBid: 3ujj [1]) illustrate that the  $V_{L\kappa}$  (green) -  $C_{L\kappa}$  (blue) interface is considerably more hydrogen bonded (yellow bars) than that of  $V_{L\lambda}$  (red) -  $C_{L\lambda}$  (cyan).

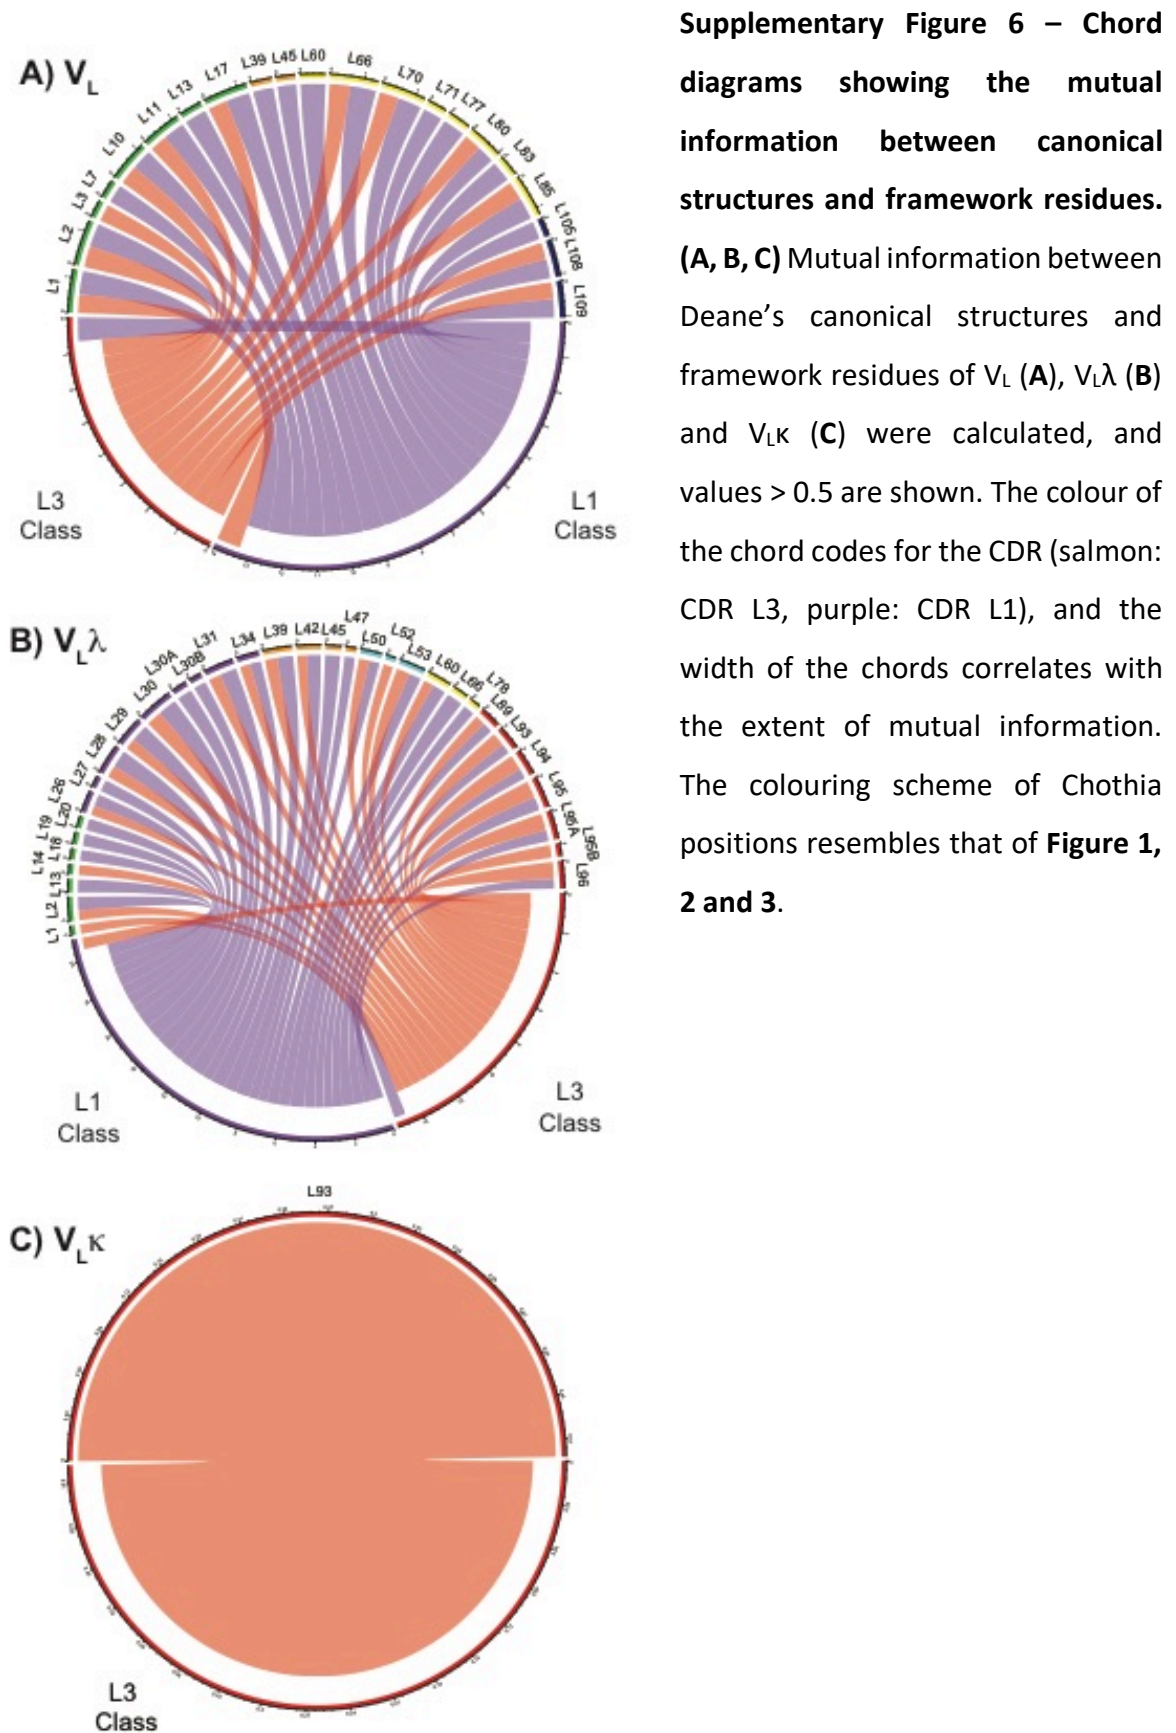

**Supplementary Tables****Supplementary Table 1 – The occurrence of distinct Chothia positions of CDR L3 in  $\kappa$  (221 structures) and  $\lambda$  (112 structures).**

| <b>Chothia #</b> | <b><math>\kappa</math> occurrence</b> | <b><math>\lambda</math> occurrence</b> |
|------------------|---------------------------------------|----------------------------------------|
| L89              | 221                                   | 112                                    |
| L90              | 221                                   | 112                                    |
| L91              | 221                                   | 112                                    |
| L92              | 211                                   | 110                                    |
| L93              | 210                                   | 109                                    |
| L94              | 209                                   | 109                                    |
| L95              | 195                                   | 109                                    |
| L95A             | 35                                    | 94                                     |
| L95B             | 15                                    | 63                                     |
| L95C             | 1                                     | 20                                     |
| L95D             | 0                                     | 2                                      |
| L96              | 221                                   | 112                                    |
| L97              | 221                                   | 112                                    |



**Supplementary Table 2 – Variables used in classification by RandomForest.**

| <b>Variable</b>       | <b>Definition</b>                                                | <b>Unit</b> |
|-----------------------|------------------------------------------------------------------|-------------|
| total.energy          | The predicted overall stability                                  | kcal/mol    |
| Backbone.Hbond        | The contribution of backbone H-bonds                             | kcal/mol    |
| Sidechain.Hbond       | The contribution of sidechain H-bonds                            | kcal/mol    |
| Van.der.Waals         | The contribution of VanderWaals forces                           | kcal/mol    |
| Electrostatics        | The contribution of electrostatic interactions                   | kcal/mol    |
| Solvation.Polar       | The penalty for burying polar residues                           | kcal/mol    |
| Solvation.Hydrophobic | The contribution of hydrophobic groups                           | kcal/mol    |
| Van.der.Waals.clashes | The penalty for VanderWaals' clashes (interresidue)              | kcal/mol    |
| entropy.sidechain     | The entropy cost of fixing the sidechain                         | kcal/mol    |
| entropy.mainchain     | The entropy cost of fixing the mainchain/backbone                | kcal/mol    |
| cis_bond              | The penalty for having a cis peptide bond                        | kcal/mol    |
| torsional.clash       | The penalty for VanderWaals' torsional clashes (intraresidue)    | kcal/mol    |
| backbone.clash        | The penalty for VanderWaals' backbone-backbone clashes           | kcal/mol    |
| helix.dipole          | The contribution of the helix dipole (electrostatic)             | kcal/mol    |
| disulfide             | The contribution of disulfide bonds                              | kcal/mol    |
| electrostatic.kon     | Th electrostatic interaction between molecules in the precomplex | kcal/mol    |
| energy.Ionisation     | The contribution of ionisation energy                            | kcal/mol    |
| sidechain.burial      | Burial of the sidechain                                          | fraction    |
| mainchain.burial      | Burial of the backbone                                           | fraction    |
| sidechain.Occ         | Occupancy of the sidechain                                       | fraction    |
| mainchain.Occ         | Occupancy of the backbone                                        | fraction    |
| GAP                   | Amount of gaps in structure                                      | Count       |
| FRcount               | Amount of residues in frame region                               | Count       |
| CDRcount              | Amount of residues in CDRs                                       | Count       |
| VARcount              | Amount of residues in variable region                            | Count       |
| CONcount              | Amount of residues in constant region                            | Count       |
| rescount              | Amount of residues                                               | Count       |
| Netcharge             | Net charge of light chain                                        | Count       |
| CDRcountL1            | Amount of residues in CDR L1                                     | Count       |
| CDRcountL2            | Amount of residues in CDR L2                                     | Count       |
| CDRcountL3            | Amount of residues in CDR L3                                     | Count       |
| CDRcountH1            | Amount of residues in CDR H1                                     | Count       |
| CDRcountH2            | Amount of residues in CDR H2                                     | Count       |
| CDRcountH3            | Amount of residues in CDR H3                                     | Count       |
| CDRcountLFR1          | Amount of residues in frame region LFR1                          | Count       |
| CDRcountLFR2          | Amount of residues in frame region LFR2                          | Count       |
| CDRcountLFR3          | Amount of residues in frame region LFR3                          | Count       |
| CDRcountLFR4          | Amount of residues in frame region LFR4                          | Count       |
| CDRcountHFR1          | Amount of residues in frame region HFR1                          | Count       |
| CDRcountHFR2          | Amount of residues in frame region HFR2                          | Count       |
| CDRcountHFR3          | Amount of residues in frame region HFR3                          | Count       |

|              |                                         |       |
|--------------|-----------------------------------------|-------|
| CDRcountHFR4 | Amount of residues in frame region HFR4 | Count |
| Charge       | Amount of charged residues              | Count |
| MASS         | Mass of light chain                     | kDa   |
| arom         | Amount of aromatic residues             | Count |

## Supplementary References

- [1] Gorny MK, Sampson J, Li H, Jiang X, Totrov M, Wang X-H, et al. Human anti-V3 HIV-1 monoclonal antibodies encoded by the VH5-51/VL lambda genes define a conserved antigenic structure. *PLoS ONE*2011. p. e27780.
- [2] Jardine JG, Kulp DW, Havenar-Daughton C, Sarkar A, Briney B, Sok D, et al. HIV-1 broadly neutralizing antibody precursor B cells revealed by germline-targeting immunogen. *Science*2016. p. 1458-63.
